# Supplementary material for: Photonic crystal nanostructure as a photodetector for NaCl solution monitoring: theoretical approach
Source: PubMed Central journal article supplement — RSC Adv. 2023 Feb 27;13(10):6737–46. doi: 10.1039/d3ra00308f (PMC9969983; doi:10.1039/d3ra00308f), 2023-02-27
Supplement: RA-013-D3RA00308F-s001.pdf [file RA-013-D3RA00308F-s001.pdf]

## Photonic crystal nanostructure as a photodetector for NaCl solution monitoring:

### Theoretical approach

Abdulkarem H. M. Almawgani<sup>1</sup>, Hussein A. Elsayed<sup>2</sup>, Ahmed Mehaney<sup>2, \*</sup>, T.A. Taha<sup>3, 4</sup>, Ziyad Awadh Alrowaili<sup>3</sup>, Ghassan Ahmed Ali<sup>5</sup>, Walied Sabra<sup>2</sup>, Sayed Asaduzzaman<sup>6, 7</sup>, and Ashour M. Ahmed<sup>2, 8</sup>

<sup>1</sup> Electrical Engineering Department, College of Engineering, Najran University, Najran, Kingdom of Saudi Arabia

<sup>2</sup> Physics Department, Faculty of Science, Beni-Suef University, Beni-Suef, 62512, Egypt

<sup>3</sup> Physics department, College of Science, Jouf University, P.O. Box:2014, Sakaka, Saudi Arabia

<sup>4</sup> Physics and Engineering Mathematics Department, Faculty of Electronic Engineering, Menoufia University, Menouf 32952, Egypt

<sup>5</sup> Information Systems Department, College of Computer Sciences and Information Systems, Najran University, Najran, Saudi Arabia

<sup>6</sup> Department of CSE, Rangamati Science and Technology University, Rangamati, Bangladesh

<sup>7</sup> Department of Computer Science and Engineering, Daffodil International University, Dhaka, Bangladesh

<sup>8</sup> Physics Department, College of Science, Imam Mohammad Ibn Saud Islamic University (IMSIU), Riyadh 11623, Saudi Arabia

\* Corresponding Author E-mails: [ahmed011236@science.bsu.edu.eg](mailto:ahmed011236@science.bsu.edu.eg),  
[ahalmawgani@nu.edu.sa](mailto:ahalmawgani@nu.edu.sa)

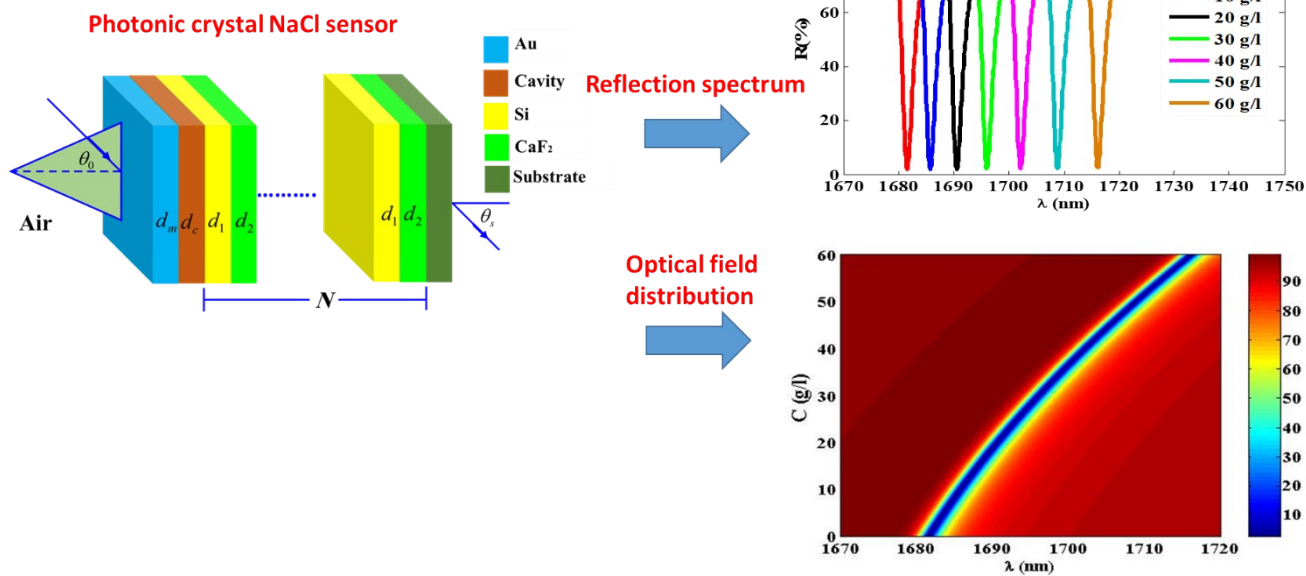

Fig. S1. Graphical 3D dimensions representation of the suggested NaCl sensor that configured as, [Prism/Au/water cavity/(Si/CaF<sub>2</sub>)<sup>N</sup>/glass substrate].

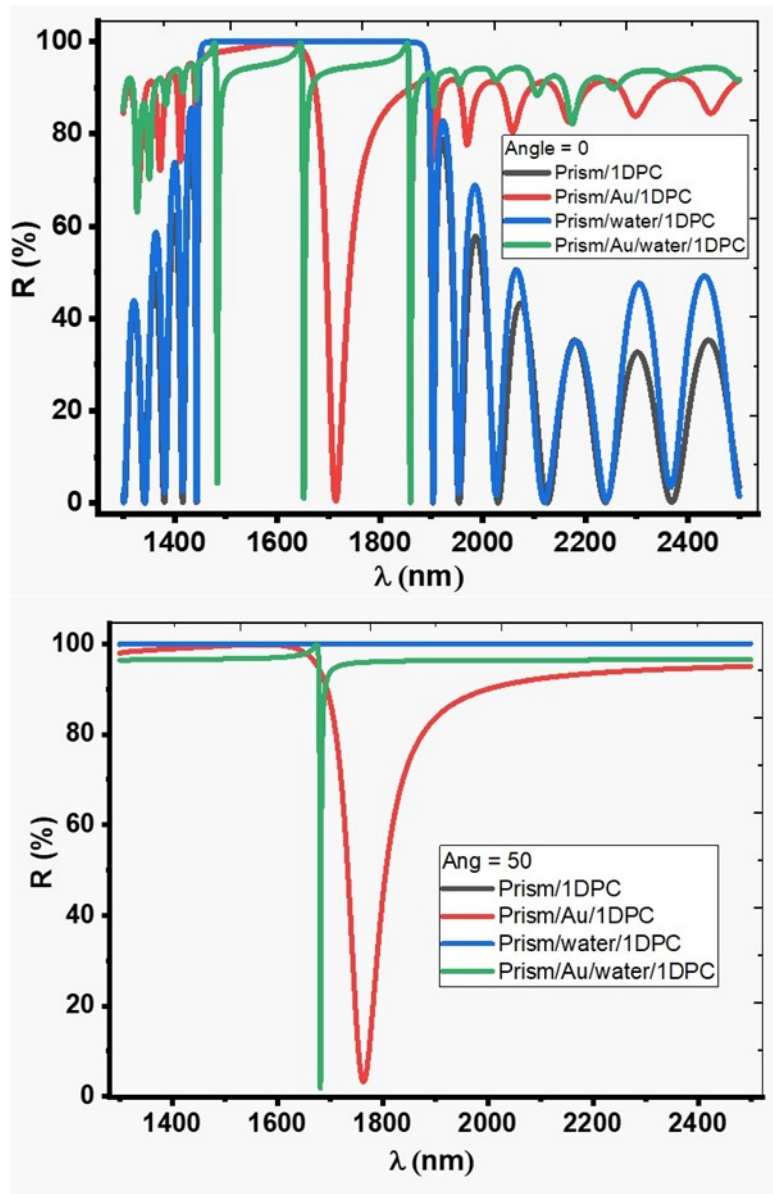

Fig. S2. The effect of the of the cavity layer on the reflectance of of the 1D PCs.

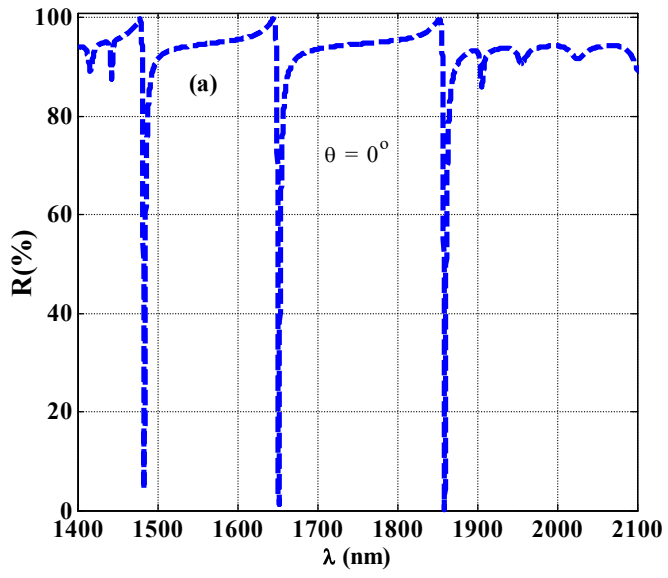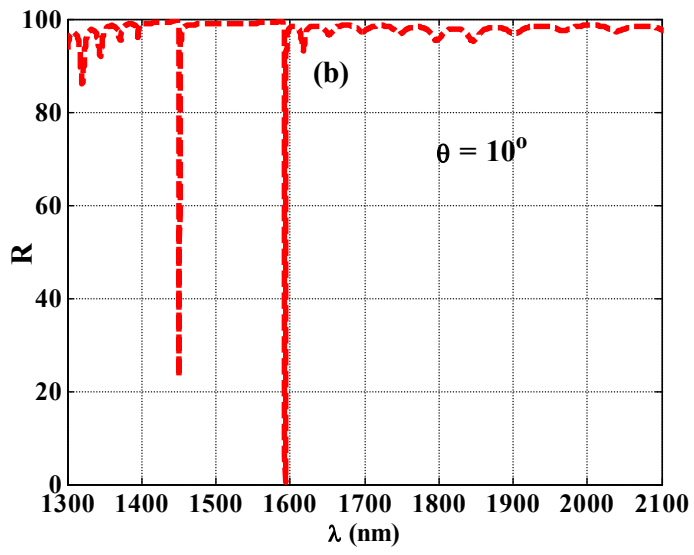

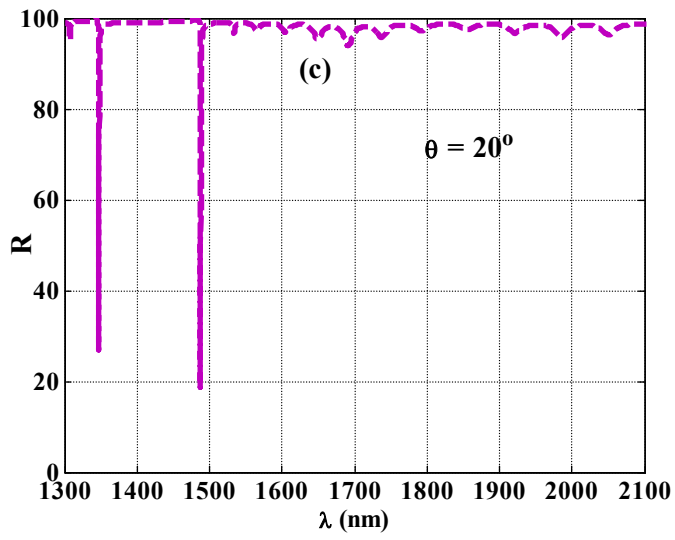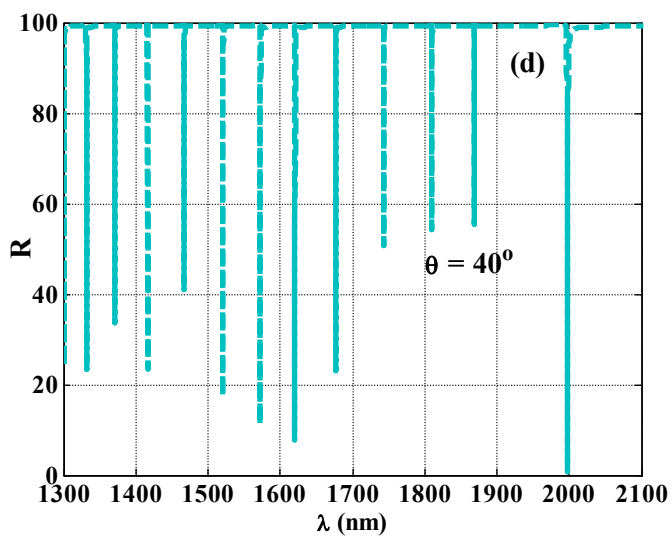

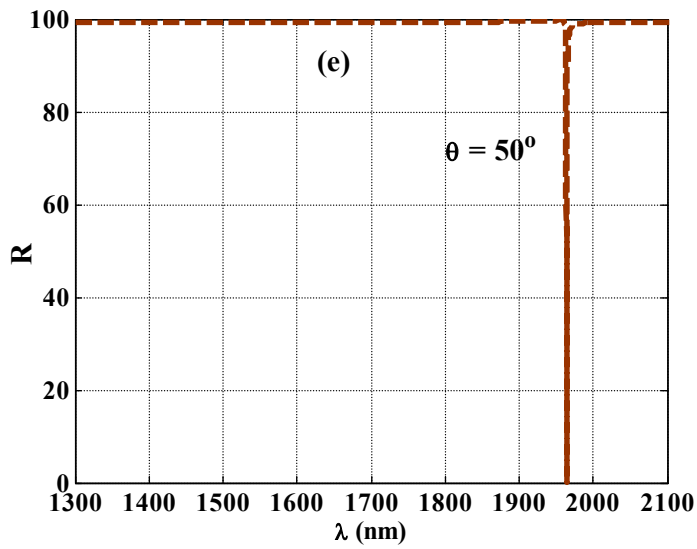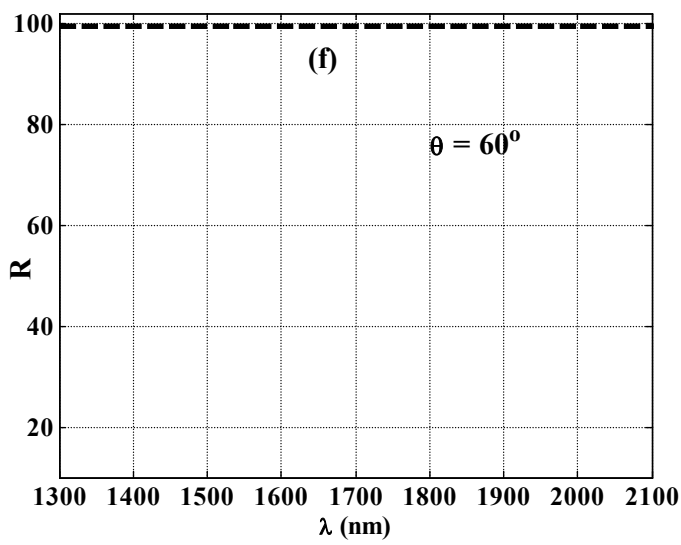

Fig. S3. The effect of the angle of incidence on the number of the TP resonance mode relative to the change in the concentration of NaCl solution.
